# Supplementary material for: In-hospital glycemic variability and all-cause mortality among patients hospitalized for acute heart failure
Source: Springer Nature journal article supplement (doi:10.1186/s12933-022-01720-4), 2022-12-27

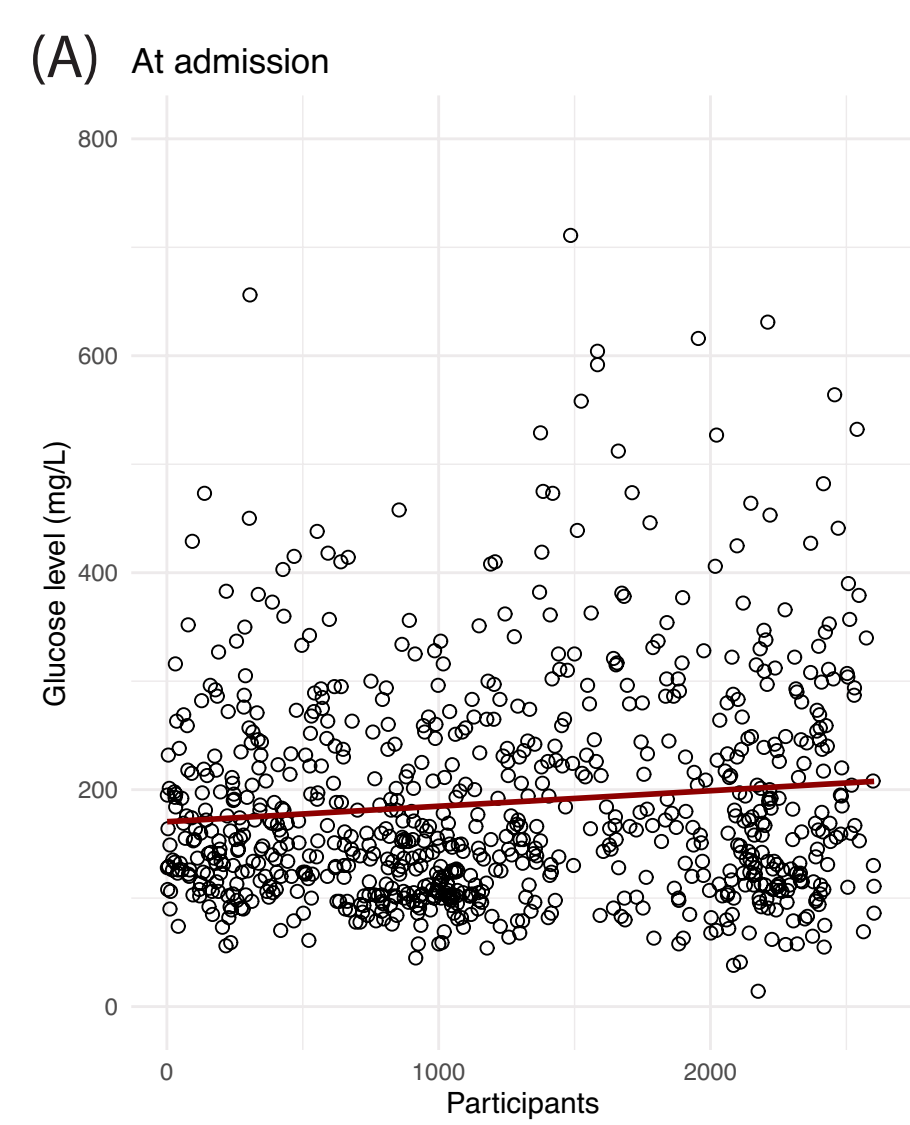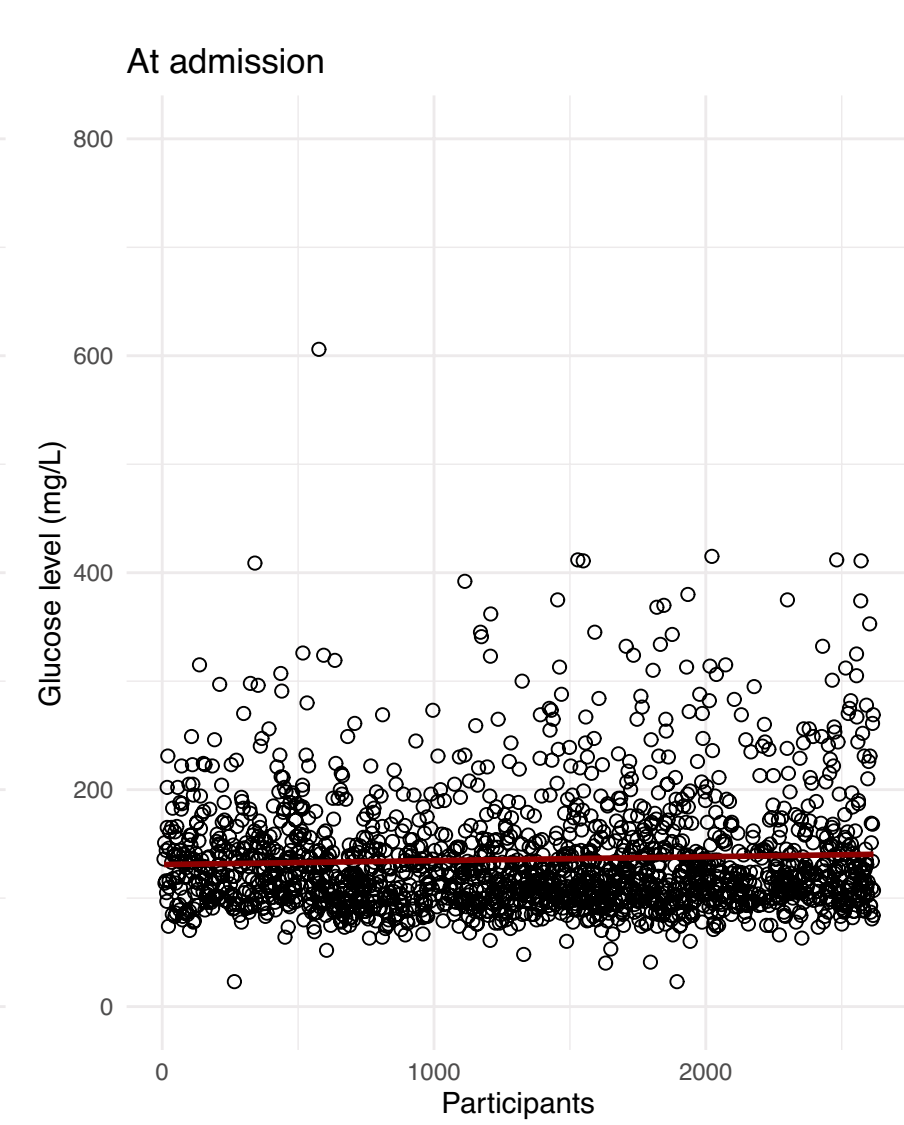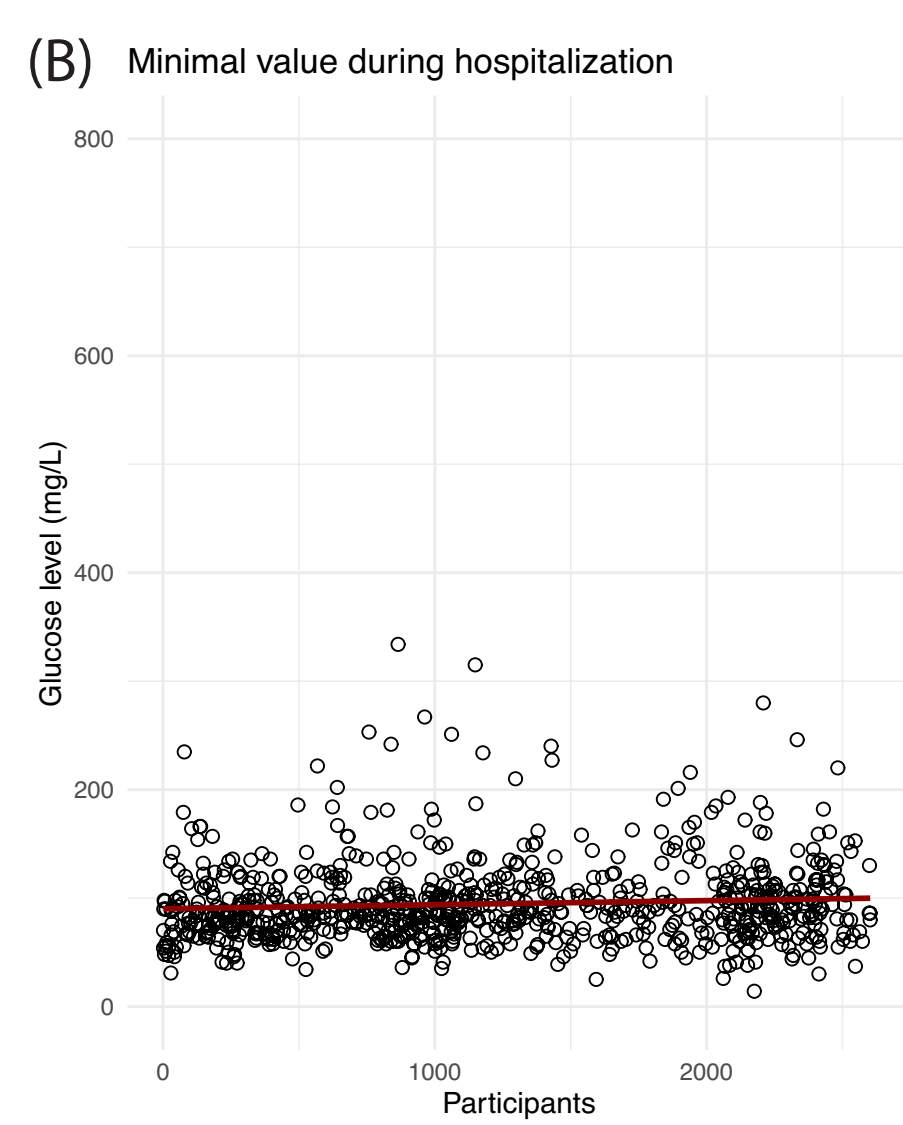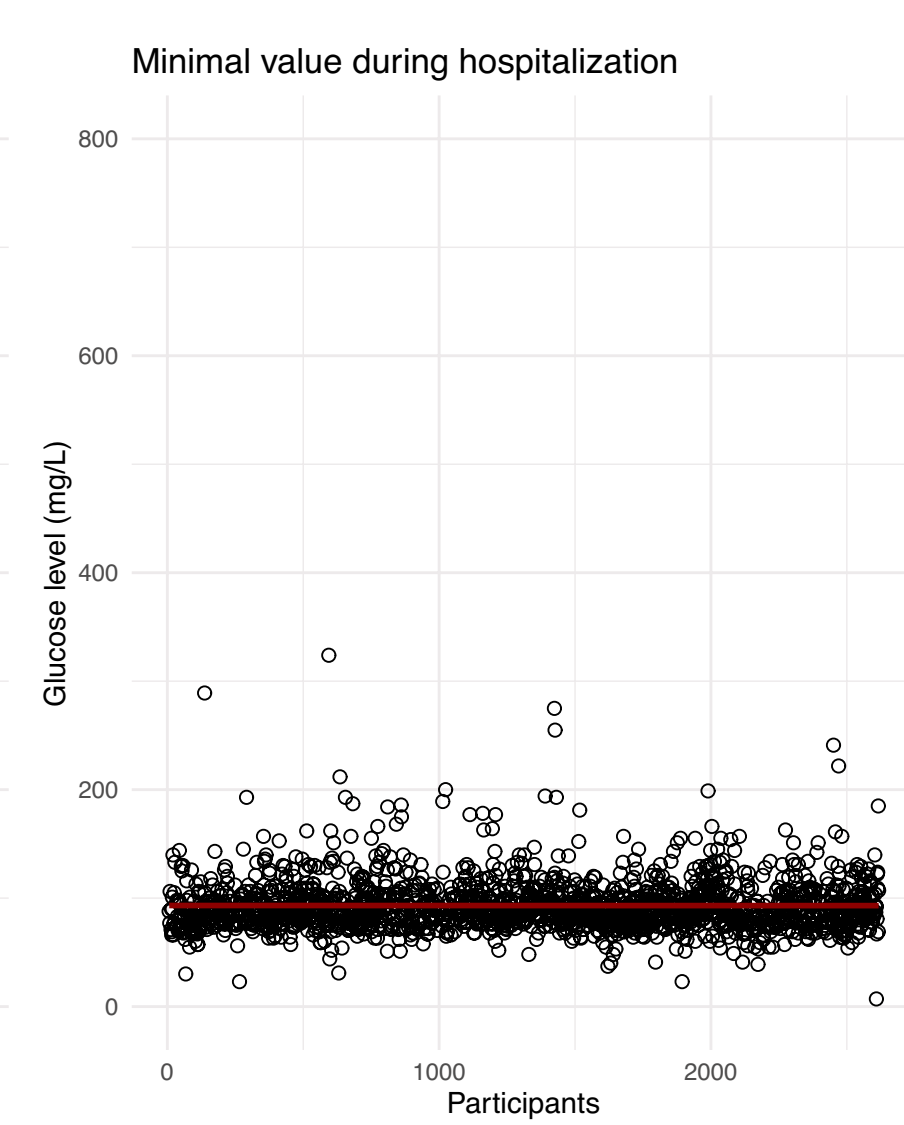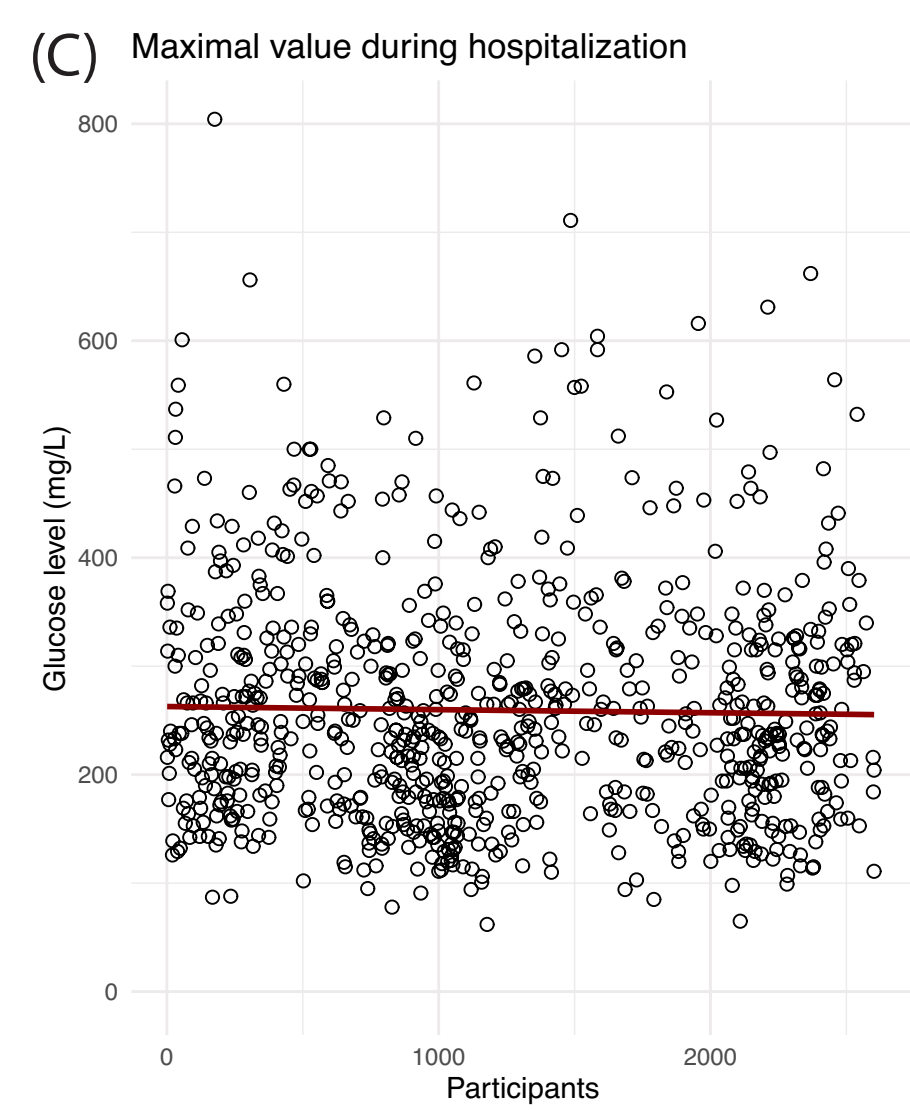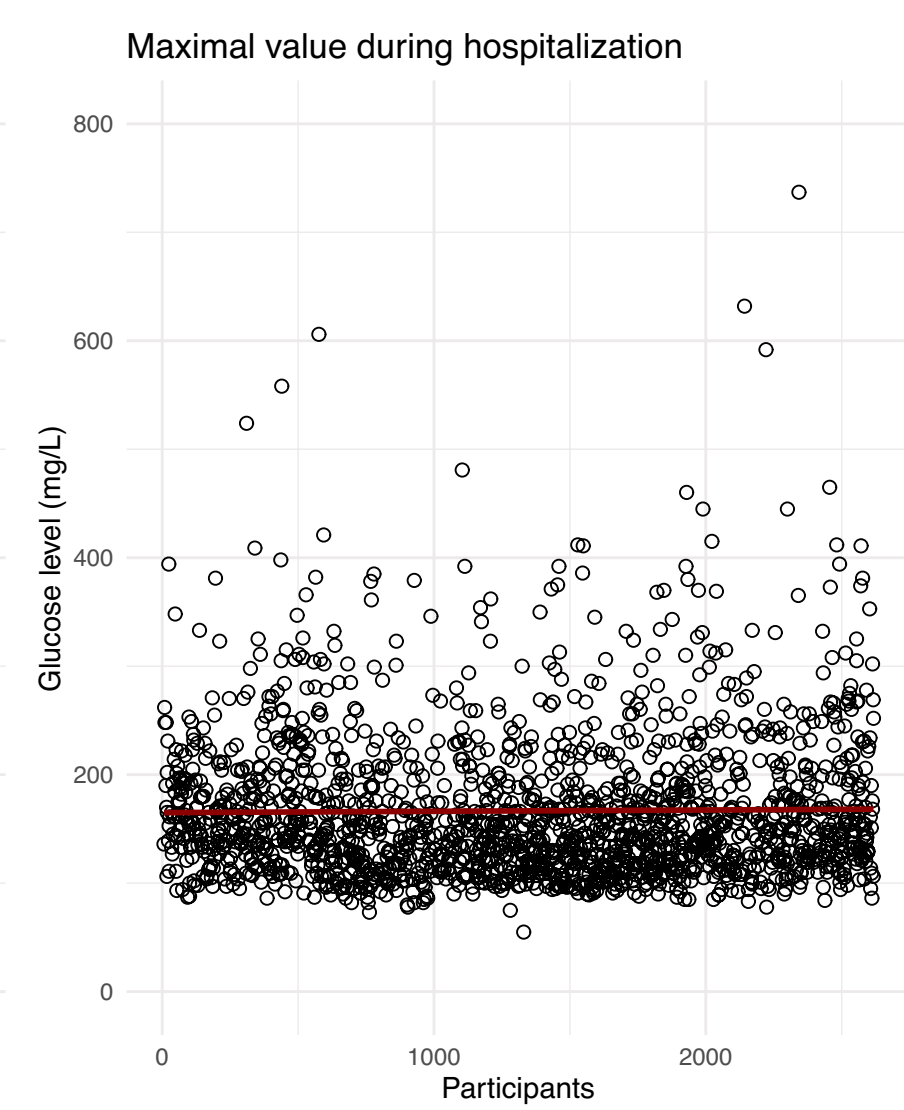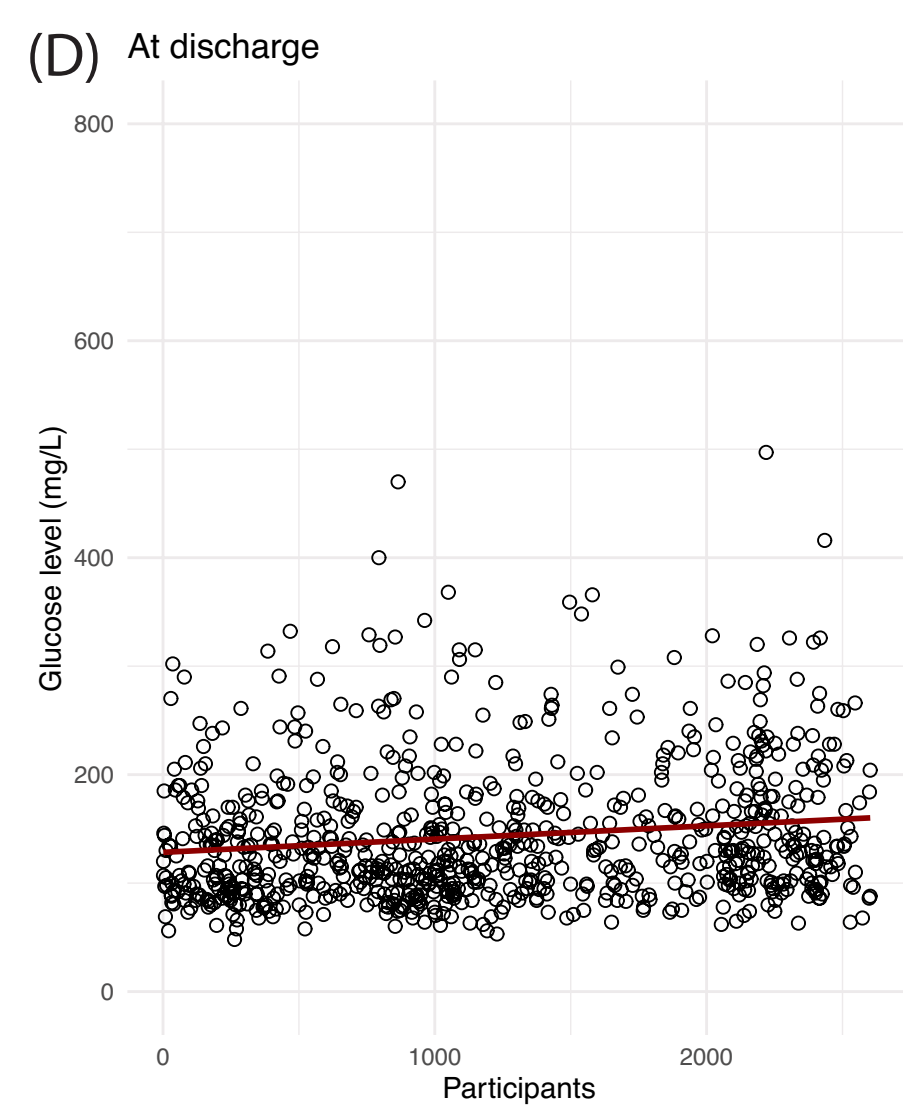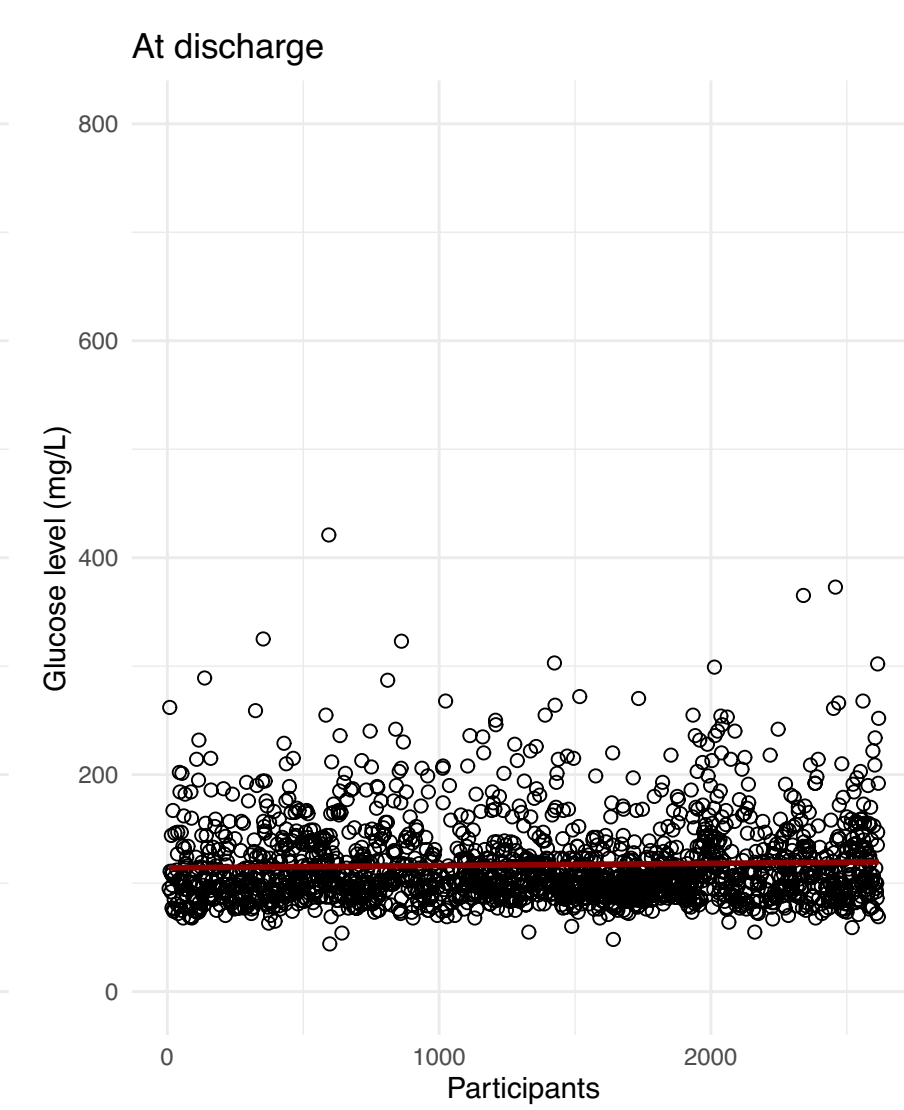

Supplement: MOESM4 [file 23861198]
